# Supplementary material for: Design and Manufacture of a Low-Cost Microfluidic System for the Synthesis of Giant Liposomes for the Encapsulation of Yeast Homologues: Applications in the Screening of Membrane-Active Peptide Libraries
Source: MDPI journal article supplement (doi:10.3390/mi12111377), 2021-11-10
Supplement: s1 [file s1]

## Supplementary Materials

# Design and Manufacture of a Low-Cost Microfluidic System for the Synthesis of Giant Liposomes for the Encapsulation of Yeast Homologues: Applications in the Screening of Membrane-Active Peptide Libraries

Saúl C. Gómez <sup>1,†</sup>, Valentina Quezada <sup>1,†</sup>, Isabella Quiroz <sup>1</sup>, Carolina Muñoz-Camargo <sup>1</sup>, Johann F. Osma <sup>2,\*</sup>, Luis H. Reyes <sup>3,\*</sup> and Juan C. Cruz <sup>1,\*</sup>

**Citation:** Gómez, S.C.; Quezada, V.; Quiroz, I.; Muñoz-Camargo, C.; Osma, J.F.; Reyes, L.H.; Cruz, J.C. Design and Manufacture of a Low-Cost Microfluidic System for the Synthesis of Giant Liposomes for the Encapsulation of Yeast Homologues: Applications in the Screening of Membrane-Active Peptide Libraries. *Micromachines* **2021**, *12*, 1377. <https://doi.org/10.3390/mi12111377>

Academic Editor: Palaniappan Sethu

Received: 11 October 2021

Accepted: 6 November 2021

Published: 8 November 2021

**Publisher's Note:** MDPI stays neutral with regard to jurisdictional claims in published maps and institutional affiliations.

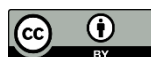

**Copyright:** © 2021 by the authors. Licensee MDPI, Basel, Switzerland. This article is an open access article distributed under the terms and conditions of the Creative Commons Attribution (CC BY) license (<http://creativecommons.org/licenses/by/4.0/>).

<sup>1</sup> Department of Biomedical Engineering, Universidad de los Andes, Cra. 1E No. 19a-40, Bogotá 111711, Colombia; sc.gomez11@uniandes.edu.co (S.C.G.); v.quezada@uniandes.edu.co (V.Q.); i.quiroz@uniandes.edu.co (I.Q.); c.munoz2016@uniandes.edu.co (C.M.-C.)

<sup>2</sup> Department of Electrical and Electronic Engineering, Universidad de los Andes, Cra. 1E No. 19a-40, Bogotá 111711, Colombia

<sup>3</sup> Department of Food and Chemical Engineering, Universidad de los Andes, Cra. 1E No. 19a-40, Bogotá 111711, Colombia

\* Correspondence: jf.osma43@uniandes.edu.co (J.F.O.); lh.reyes@uniandes.edu.co (L.H.R.); jc.cruz@uniandes.edu.co (J.C.C.); Tel.: +57-1-3394949 (ext. 1789) (J.C.C.)

† Co-first author, these authors contributed equally to this work.

**SI1. Double Emulsion Generation Simulation. Two-phase Flow, Level-set model in COMSOL Multiphysics®****Table S1.** Summary of parameters for the Multiphysics simulations to produce GUVs.

| Parameter | Value       | Units |
|-----------|-------------|-------|
| $V_{IA}$  | 0.001851853 | m/s   |
| $V_{LO}$  | 0.018518533 | m/s   |
| $V_{OA}$  | 0.0555556   | m/s   |
| FRR       | 1:10:30     |       |
| TFR       | 0.075926    | m/s   |

(a)

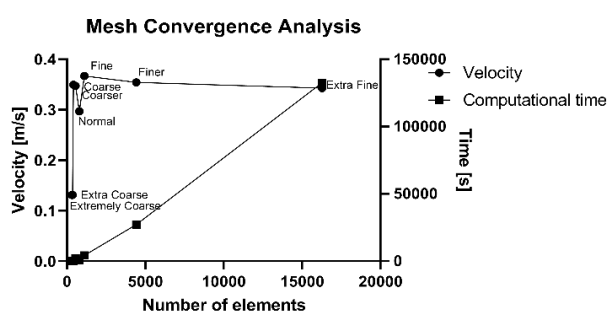

(b)

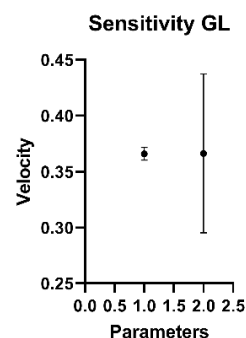**Figure S1.** (a) Mesh convergence analysis for the velocity field and the computational time and (b) sensitivity analysis for FRR and TFR.**SI2. Yeast Encapsulation by Direct Interaction Simulation. Mixture Model in COMSOL Multiphysics®****Table S2.** Summary of parameters for the Multiphysics simulations of encapsulation.

| Parameter                                               | Value           | Units         |
|---------------------------------------------------------|-----------------|---------------|
| FRR                                                     | 1:1 – 2:1 – 3:1 | -             |
| TFR                                                     | 0.084           | m/s           |
| Particle diameter ( $d_p$ )                             | 50              | $\mu\text{m}$ |
| Maximum packaging concentration ( $\phi_{\text{max}}$ ) | 0.2             | -             |
| Minimum volume fraction – Dispersed phase ( $\phi_d$ )  | 0.2             | -             |

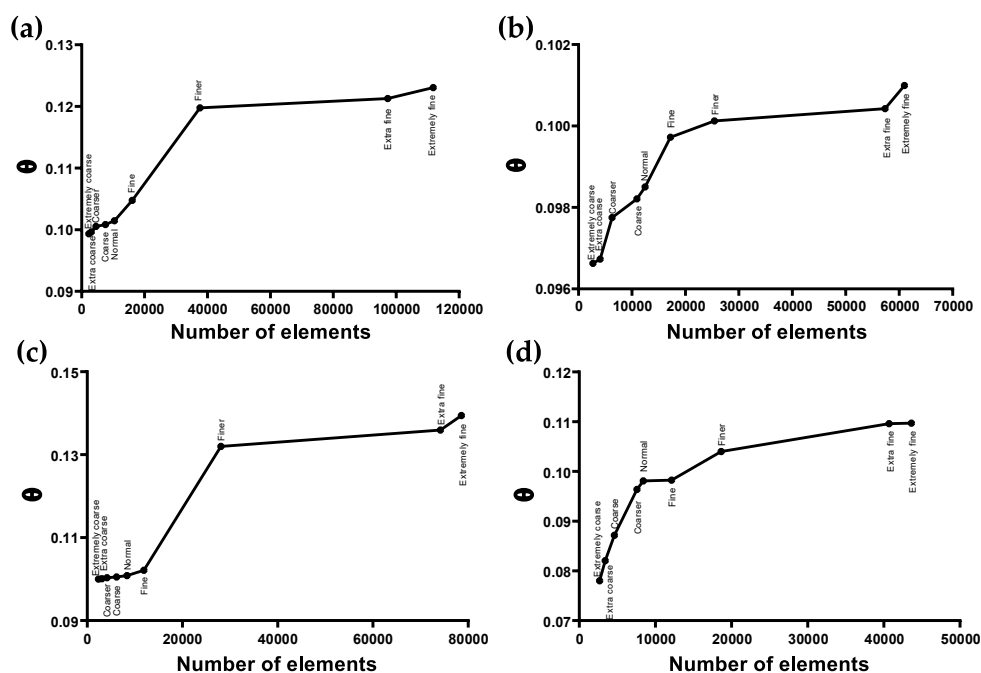

**Figure S2.** Mesh convergence analysis for the volume fraction dispersed phase ( $\theta$ ) of the micromixers: (a) Chambers; (b) Circular features; (c) SARS; (d) Serpentine.

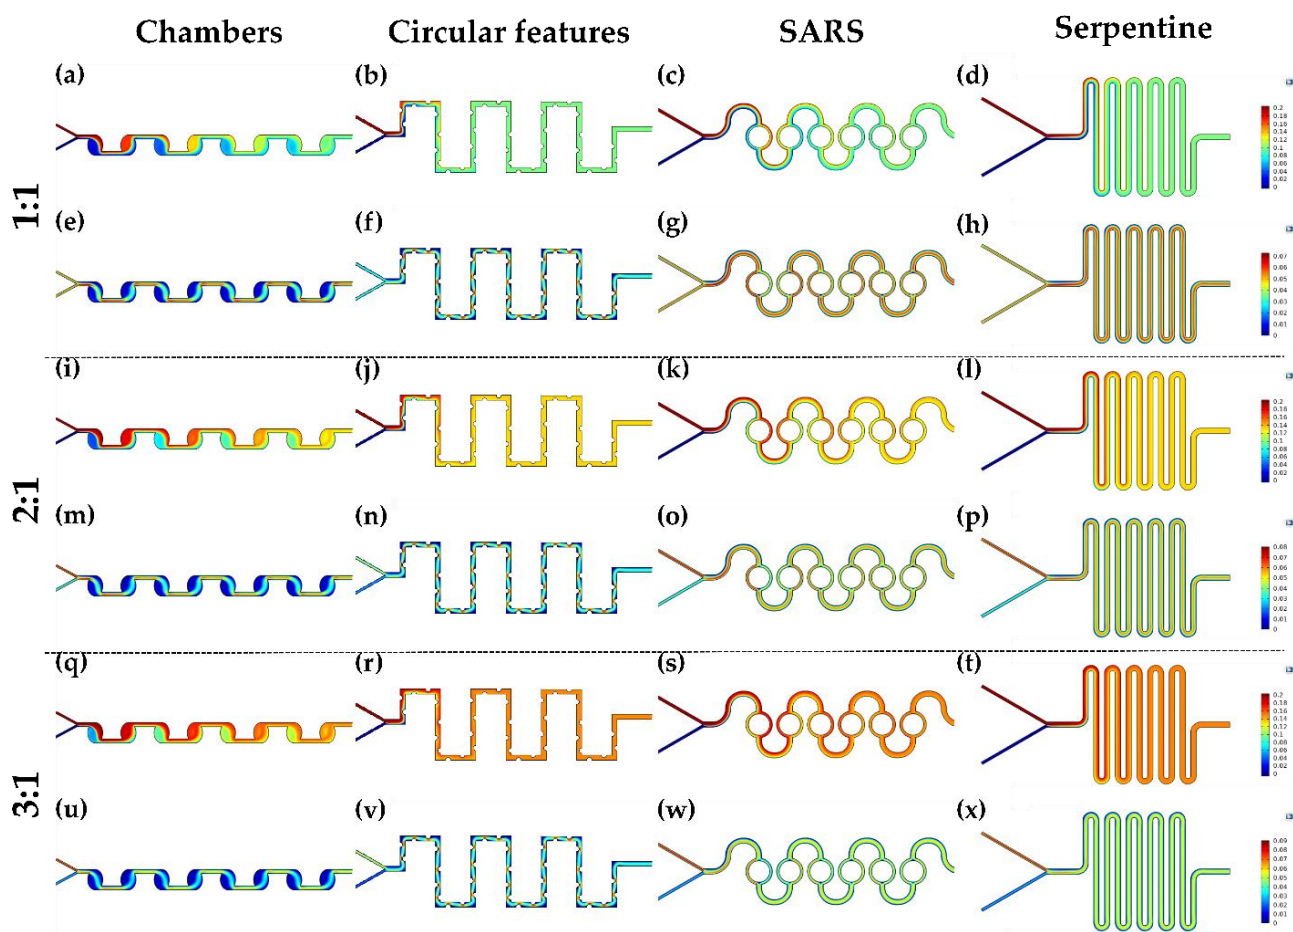

**Figure S3.** *In silico* results for the volume fraction of the dispersed phase ( $\theta$ ) (a-d; i-l; q-t) and the velocity field (e-h; m-p; u-x) (VF) for each FRR in the micromixers.

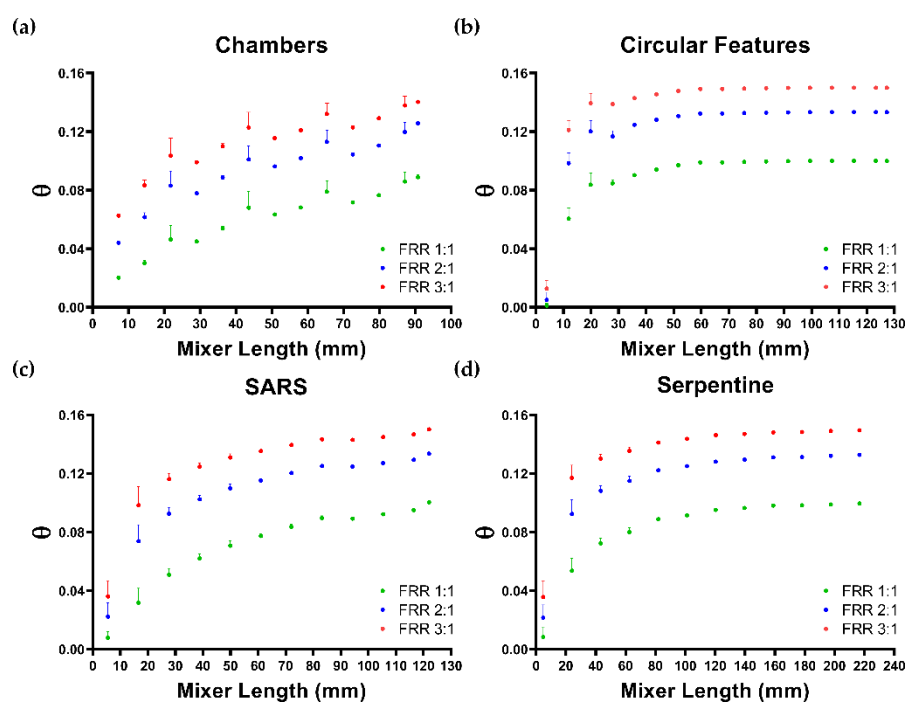

**Figure S4.** *In silico* mixing behavior: (a) Chambers; (b) Circular features; (c) SARS; (d) Serpentine.

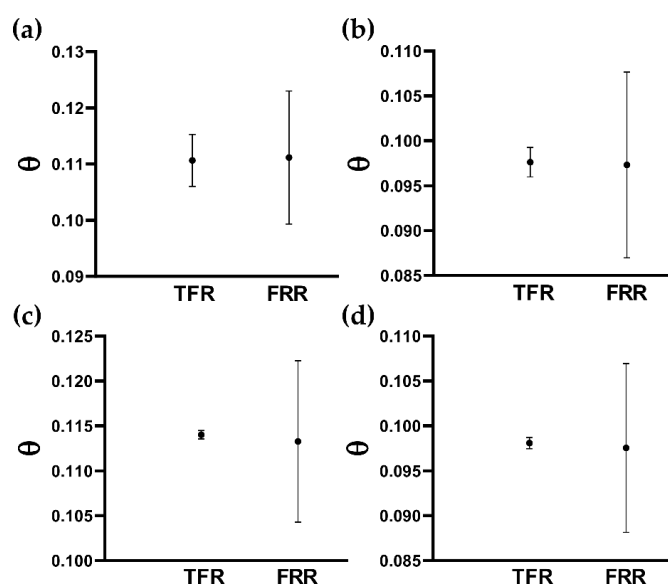

**Figure S5.** Sensitivity analysis for the FRR and TFR micromixers parameters: (a) Chambers; (b) Circular features; (c) SARS; (d) Serpentine.

### SI3. Low-cost Octanol-assisted Liposomes Assembly FRR Characterization

**Table S3.** Summary of fluidic parameters for the experimental characterization of GUVs synthesis.

| <b>FRR</b> | <b>Flow rate [mL/h]</b>                                                 | <b>TFR [mL/h]</b> |
|------------|-------------------------------------------------------------------------|-------------------|
| 1:10:30    | Q <sub>IA</sub> : 10; Q <sub>LO</sub> : 100; Q <sub>OA</sub> : 300      | 410               |
| 1:20:60    | Q <sub>IA</sub> : 10; Q <sub>LO</sub> : 200; Q <sub>OA</sub> : 600      | 810               |
| 1:30:90    | Q <sub>IA</sub> : 6.7; Q <sub>LO</sub> : 200.8; Q <sub>OA</sub> : 602.5 | 810               |

**SI4.** Static light scattering (SLS) measurements of GUVs samples synthesized by the microfluidic system proposed

Size Distribution by Inetnsity FRR 1:10:30 – 0.01%

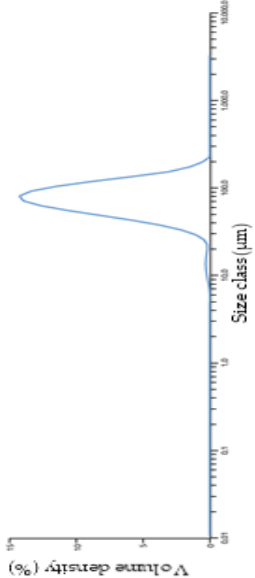

Size Distribution by Inetnsity FRR 1:10:30 – 0.02%

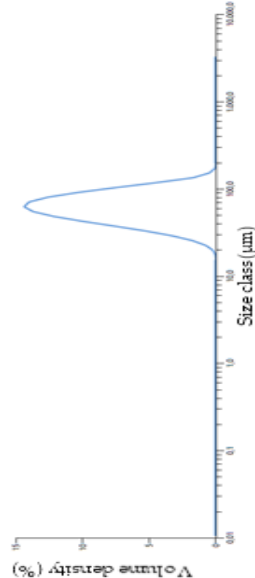

Size Distribution by Inetnsity FRR 1:10:30 – 0.04%

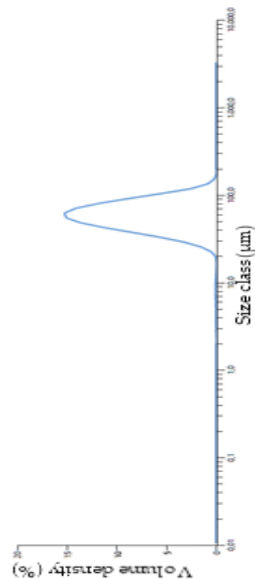

Size Distribution by Inetnsity FRR 1:20:60 – 0.01%

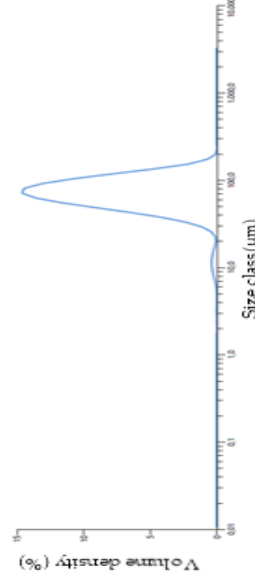

Size Distribution by Inetnsity FRR 1:20:60 – 0.02%

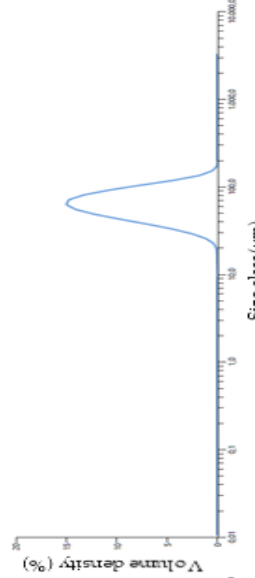

Size Distribution by Inetnsity FRR 1:20\_60 – 0.04%

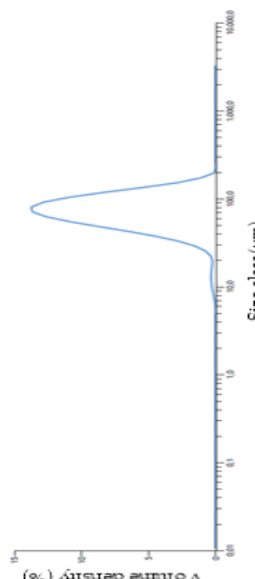

Size Distribution by Inetnsity FRR 1:30:90 – 0.01%

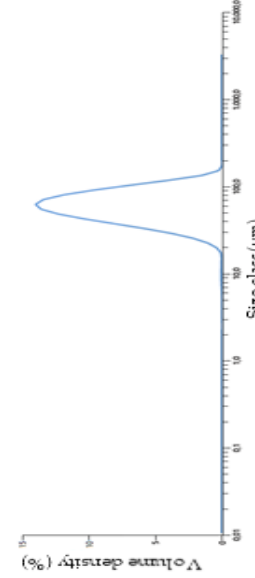

Size Distribution by Inetnsity FRR 1:30:90 – 0.02%

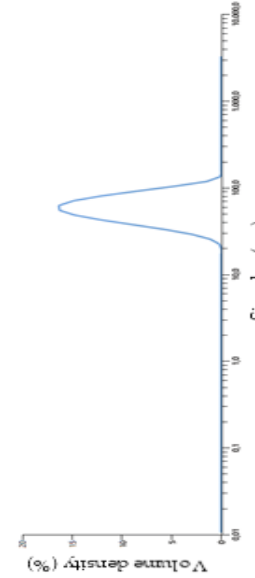

Size Distribution by Inetnsity FRR 1:30:90 – 0.04%

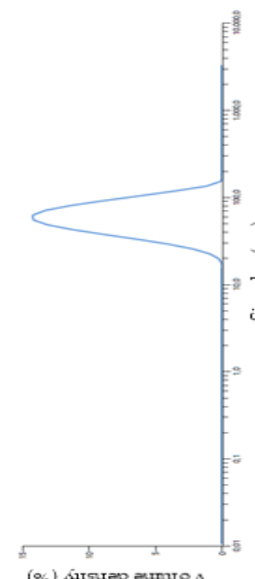

**Figure S6.** SLS measurements of GUVs samples synthesized varying the flow rate ratio (FRR) and the concentration of the LO phase.

### SI5. Colorimetric Mixing Efficiency Test vs. *In silico* approach

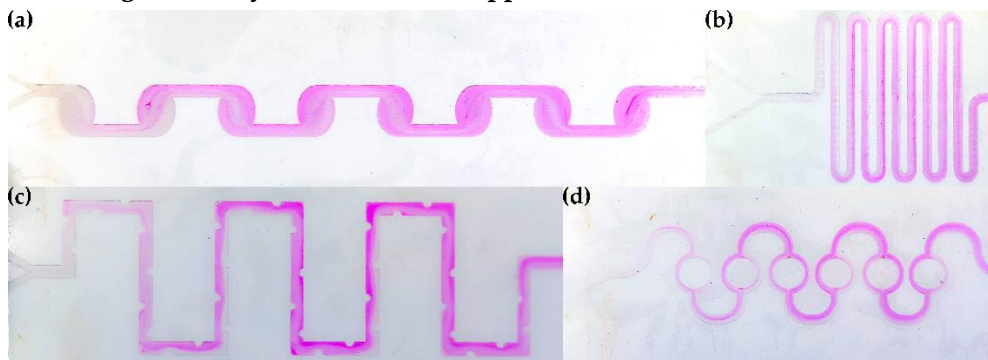

**Figure S7.** Image acquisition for the mixture efficiency calculation.

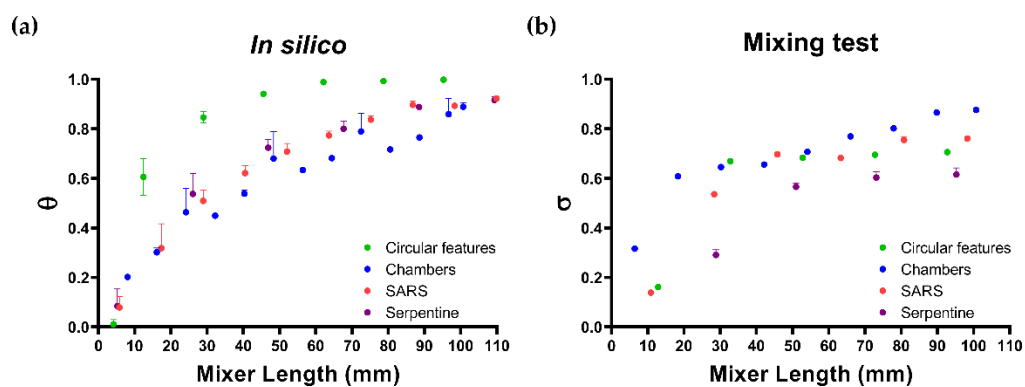

**Figure S8.** Comparison of *in silico* mixing behavior for FRR 1:1 and experimentally for the micromixers.
